# Supplementary material
Source: MDPI journal article supplement (https://www.mdpi.com/1999-4907/14/4/856)
Supplement: s1 [file s1]

# Supplementary Material

**Table S1.** The ANOVA P-value for total biomass, shoot biomass of *A. sativa*, *F. rubra*, *T. repens*, and shoot:root ratio.

|                                       | Aboveground biomass of |                 |                  | Total biomass |  | Shoot:root ratio |  |
|---------------------------------------|------------------------|-----------------|------------------|---------------|--|------------------|--|
|                                       | <i>A. sativa</i>       | <i>F. rubra</i> | <i>T. repens</i> |               |  |                  |  |
| Tailings                              | 0.000 ***              | 0.123           | 0.136            | 0.000 ***     |  | 0.112            |  |
| Amendement                            | 0.001 **               | 0.001 **        | 0.526            | 0.001 **      |  | 0.165            |  |
| Symbiotic                             | 0.002 **               | 0.175           | 0.003 **         | 0.001 **      |  | 0.411            |  |
| HerbMix                               | 0.000 ***              | 0.005 **        | 0.004 **         | 0.000 ***     |  | 0.429            |  |
| Tailings:Amendement                   | 0.123                  | 0.002 **        | 0.314            | 0.075         |  | 0.761            |  |
| Tailings:Symbiotic                    | 0.649                  | 0.089           | 0.269            | 0.664         |  | 0.511            |  |
| Amendement:Symbiotic                  | 0.700                  | 0.182           | 0.120            | 0.921         |  | 0.190            |  |
| Tailings:HerbMix                      | 0.421                  | 0.738           | 0.228            | 0.000 ***     |  | 0.394            |  |
| Amendement:HerbMix                    | 0.008 **               | 0.172           | 0.034 *          | 0.001 **      |  | 0.194            |  |
| Symbiotic:HerbMix                     | 0.226                  | 0.979           | 0.063            | 0.887         |  | 0.089            |  |
| Tailings:Amendement:Symbiotic         | 0.419                  | 0.365           | 0.806            | 0.481         |  | 0.280            |  |
| Tailings:Amendement:HerbMix           | 0.142                  | 0.383           | 0.300            | 0.381         |  | 0.881            |  |
| Tailings:Symbiotic:HerbMix            | 0.556                  | 0.447           | 0.108            | 0.666         |  | 0.294            |  |
| Amendement:Symbiotic:HerbMix          | 1.000                  | 0.139           | 0.751            | 0.250         |  | 0.650            |  |
| Tailings:Amendement:Symbiotic:HerbMix | 0.548                  | 0.091           | 0.785            | 0.101         |  | 0.308            |  |

Significance codes:  $P < 0.001$  '\*\*\*',  $P < 0.01$  '\*\*',  $P < 0.05$  '\*'

**Table S2.** The standard deviation of random effect factors on split-split plot design for each dependent variable data group of total biomass, shoot biomass of *A. sativa*, *F. rubra*, *T. repens*, and shoot:root ratio.

| Groups                                    | No. of Obs. | Aboveground biomass of |                 |                  | Total biomass | Shoot:root ratio |
|-------------------------------------------|-------------|------------------------|-----------------|------------------|---------------|------------------|
|                                           |             | <i>A. sativa</i>       | <i>F. rubra</i> | <i>T. repens</i> |               |                  |
| Inoculation:(Supplement:(Tailings:Block)) | 36          | 0.000                  | 0.000           | 0.627            | 0.000         | 0.000            |
| Supplement:(Tailings:Block)               | 18          | 0.058                  | 0.069           | 0.000            | 0.013         | 0.000            |
| Tailings:Block                            | 6           | 0.000                  | 0.275           | 0.772            | 0.000         | 0.200            |
| Block                                     | 3           | 0.129                  | 0.140           | 0.000            | 0.120         | 0.084            |
| Residual                                  |             | 0.260                  | 0.243           | 0.775            | 0.208         | 0.277            |

**Table S3.** Type III Analysis of Variance Table with Satterthwaite's method on diameter growth of tree species on waste rock and fine tailing without spacing factor.

| Source              | Sum Sq | DF | F value | Pr(>F)    |
|---------------------|--------|----|---------|-----------|
| Species             | 5.760  | 3  | 1.030   | 0.378     |
| Biochar             | 5.027  | 1  | 2.696   | 0.101     |
| Inoculation         | 5.751  | 1  | 3.085   | 0.079     |
| Tailings            | 3.100  | 1  | 1.663   | 0.215     |
| HerbMix             | 0.270  | 1  | 0.145   | 0.704     |
| InitDiameter        | 28.560 | 1  | 15.318  | 0.000 *** |
| Species:Biochar     | 4.930  | 3  | 0.882   | 0.450     |
| Species:Inoculation | 35.145 | 3  | 6.284   | 0.000 *** |
| Biochar:Inoculation | 5.386  | 1  | 2.889   | 0.089     |
| Species:Tailings    | 3.689  | 3  | 0.660   | 0.577     |
| Biochar:Tailings    | 4.276  | 1  | 2.293   | 0.130     |

|                                                   |        |   |       |       |    |
|---------------------------------------------------|--------|---|-------|-------|----|
| Inoculation:Tailings                              | 8.169  | 1 | 4.381 | 0.037 | *  |
| Species:HerbMix                                   | 1.624  | 3 | 0.290 | 0.832 |    |
| Biochar:HerbMix                                   | 0.201  | 1 | 0.108 | 0.743 |    |
| Inoculation:HerbMix                               | 17.020 | 1 | 9.129 | 0.003 | ** |
| Tailings:HerbMix                                  | 1.122  | 1 | 0.602 | 0.438 |    |
| Species:InitDiameter                              | 25.883 | 3 | 4.628 | 0.003 | ** |
| Biochar:InitDiameter                              | 3.250  | 1 | 1.743 | 0.187 |    |
| Inoculation:InitDiameter                          | 2.403  | 1 | 1.289 | 0.256 |    |
| Tailings:InitDiameter                             | 11.263 | 1 | 6.041 | 0.014 | *  |
| HerbMix:InitDiameter                              | 1.484  | 1 | 0.796 | 0.372 |    |
| Species:Biochar:Inoculation                       | 7.171  | 3 | 1.282 | 0.279 |    |
| Species:Biochar:Tailings                          | 5.221  | 3 | 0.933 | 0.424 |    |
| Species:Inoculation:Tailings                      | 7.982  | 3 | 1.427 | 0.233 |    |
| Biochar:Inoculation:Tailings                      | 8.304  | 1 | 4.454 | 0.035 | *  |
| Species:Biochar:HerbMix                           | 1.737  | 3 | 0.311 | 0.818 |    |
| Species:Inoculation:HerbMix                       | 27.813 | 3 | 4.973 | 0.002 | ** |
| Biochar:Inoculation:HerbMix                       | 5.302  | 1 | 2.844 | 0.092 |    |
| Species:Tailings:HerbMix                          | 0.975  | 3 | 0.174 | 0.914 |    |
| Biochar:Tailings:HerbMix                          | 1.026  | 1 | 0.550 | 0.458 |    |
| Inoculation:Tailings:HerbMix                      | 8.164  | 1 | 4.379 | 0.037 | *  |
| Species:Biochar:InitDiameter                      | 3.895  | 3 | 0.696 | 0.554 |    |
| Species:Inoculation:InitDiameter                  | 22.732 | 3 | 4.064 | 0.007 | ** |
| Biochar:Inoculation:InitDiameter                  | 4.528  | 1 | 2.429 | 0.119 |    |
| Species:Tailings:InitDiameter                     | 4.659  | 3 | 0.833 | 0.476 |    |
| Biochar:Tailings:InitDiameter                     | 4.380  | 1 | 2.349 | 0.125 |    |
| Inoculation:Tailings:InitDiameter                 | 13.223 | 1 | 7.092 | 0.008 | ** |
| Species:HerbMix:InitDiameter                      | 1.438  | 3 | 0.257 | 0.856 |    |
| Biochar:HerbMix:InitDiameter                      | 0.543  | 1 | 0.291 | 0.590 |    |
| Inoculation:HerbMix:InitDiameter                  | 10.533 | 1 | 5.650 | 0.018 | *  |
| Tailings:HerbMix:InitDiameter                     | 3.206  | 1 | 1.720 | 0.190 |    |
| Species:Biochar:Inoculation:Tailings              | 9.056  | 3 | 1.619 | 0.183 |    |
| Species:Biochar:Inoculation:HerbMix               | 22.172 | 3 | 3.964 | 0.008 | ** |
| Species:Biochar:Tailings:HerbMix                  | 1.562  | 3 | 0.279 | 0.840 |    |
| Species:Inoculation:Tailings:HerbMix              | 11.877 | 3 | 2.124 | 0.095 |    |
| Biochar:Inoculation:Tailings:HerbMix              | 0.201  | 1 | 0.108 | 0.742 |    |
| Species:Biochar:Inoculation:InitDiameter          | 4.923  | 3 | 0.880 | 0.451 |    |
| Species:Biochar:Tailings:InitDiameter             | 5.946  | 3 | 1.063 | 0.364 |    |
| Species:Inoculation:Tailings:InitDiameter         | 8.433  | 3 | 1.508 | 0.211 |    |
| Biochar:Inoculation:Tailings:InitDiameter         | 2.546  | 1 | 1.365 | 0.243 |    |
| Species:Biochar:HerbMix:InitDiameter              | 3.230  | 3 | 0.577 | 0.630 |    |
| Species:Inoculation:HerbMix:InitDiameter          | 24.610 | 3 | 4.400 | 0.004 | ** |
| Biochar:Inoculation:HerbMix:InitDiameter          | 2.582  | 1 | 1.385 | 0.239 |    |
| Species:Tailings:HerbMix:InitDiameter             | 2.438  | 3 | 0.436 | 0.727 |    |
| Biochar:Tailings:HerbMix:InitDiameter             | 1.380  | 1 | 0.740 | 0.390 |    |
| Inoculation:Tailings:HerbMix:InitDiameter         | 8.491  | 1 | 4.554 | 0.033 | *  |
| Species:Biochar:Inoculation:Tailings:HerbMix      | 6.679  | 3 | 1.194 | 0.310 |    |
| Species:Biochar:Inoculation:Tailings:InitDiameter | 4.024  | 3 | 0.720 | 0.540 |    |
| Species:Biochar:Inoculation:HerbMix:InitDiameter  | 25.259 | 3 | 4.516 | 0.004 | ** |

|                                                           |        |   |       |       |
|-----------------------------------------------------------|--------|---|-------|-------|
| Species:Biochar:Tailings:HerbMix:InitDiameter             | 1.716  | 3 | 0.307 | 0.821 |
| Species:Inoculation:Tailings:HerbMix:InitDiameter         | 12.417 | 3 | 2.220 | 0.084 |
| Biochar:Inoculation:Tailings:HerbMix:InitDiameter         | 0.048  | 1 | 0.026 | 0.873 |
| Species:Biochar:Inoculation:Tailings:HerbMix:InitDiameter | 7.498  | 3 | 1.340 | 0.259 |

*Significance codes:  $P < 0.001$  '\*\*\*',  $P < 0.01$  '\*\*',  $P < 0.05$  '\*'*

**Table S4.** The standard deviation of random effect factors on split-split plot design for regression model on data group of fine tailing and waste rock without spacing effect. The total observation data is 2795.

| Groups                                                      | No. of Obs. | Variance | Std.Dev. |
|-------------------------------------------------------------|-------------|----------|----------|
| HerbMix:(Inoculation:(Biochar:(Block:(Tailings:Location)))) | 122         | 0.051    | 0.226    |
| Inoculation:(Biochar:(Block:(Tailings:Location)))           | 63          | 0.052    | 0.228    |
| Biochar:(Block:( Tailings:Location))                        | 32          | 0.000    | 0.000    |
| Block:( Tailings:Location)                                  | 16          | 0.001    | 0.030    |
| Tailings:Location                                           | 4           | 0.031    | 0.177    |
| Location                                                    | 2           | 0.000    | 0.000    |
| Residual                                                    |             | 1.864    | 1.365    |

**Table S5.** Type III Analysis of Variance Table with Satterthwaite's method on diameter growth of tree species on fine tailing only with the inclusion of spacing factor.

| Source                           | Sum Sq | DF | F value | Pr(>F) |    |
|----------------------------------|--------|----|---------|--------|----|
| Species                          | 21.944 | 3  | 3.946   | 0.008  | ** |
| InitDiameter                     | 5.209  | 1  | 2.810   | 0.094  |    |
| Biochar                          | 0.694  | 1  | 0.374   | 0.541  |    |
| Inoculation                      | 0.054  | 1  | 0.029   | 0.865  |    |
| HerbMix                          | 0.333  | 1  | 0.180   | 0.672  |    |
| Spacing                          | 2.663  | 2  | 0.718   | 0.488  |    |
| Species:InitDiameter             | 15.171 | 3  | 2.728   | 0.043  | *  |
| Species:Biochar                  | 2.786  | 3  | 0.501   | 0.682  |    |
| InitDiameter:Biochar             | 0.186  | 1  | 0.101   | 0.751  |    |
| Species:Inoculation              | 19.401 | 3  | 3.489   | 0.015  | *  |
| InitDiameter:Inoculation         | 5.091  | 1  | 2.746   | 0.098  |    |
| Biochar:Inoculation              | 0.000  | 1  | 0.000   | 0.994  |    |
| Species:HerbMix                  | 3.028  | 3  | 0.544   | 0.652  |    |
| InitDiameter:HerbMix             | 0.288  | 1  | 0.156   | 0.693  |    |
| Biochar:HerbMix                  | 0.862  | 1  | 0.465   | 0.496  |    |
| Inoculation:HerbMix              | 1.853  | 1  | 1.000   | 0.318  |    |
| Species:Spacing                  | 8.036  | 6  | 0.722   | 0.632  |    |
| InitDiameter:Spacing             | 5.002  | 2  | 1.349   | 0.260  |    |
| Biochar:Spacing                  | 2.981  | 2  | 0.804   | 0.448  |    |
| Inoculation:Spacing              | 3.679  | 2  | 0.992   | 0.371  |    |
| HerbMix:Spacing                  | 17.429 | 2  | 4.701   | 0.009  | ** |
| Species:InitDiameter:Biochar     | 6.319  | 3  | 1.136   | 0.333  |    |
| Species:InitDiameter:Inoculation | 10.523 | 3  | 1.892   | 0.129  |    |
| Species:Biochar:Inoculation      | 1.750  | 3  | 0.315   | 0.815  |    |
| InitDiameter:Biochar:Inoculation | 1.623  | 1  | 0.876   | 0.350  |    |
| Species:InitDiameter:HerbMix     | 5.297  | 3  | 0.952   | 0.414  |    |
| Species:Biochar:HerbMix          | 3.629  | 3  | 0.653   | 0.581  |    |
| InitDiameter:Biochar:HerbMix     | 0.613  | 1  | 0.331   | 0.565  |    |

|                                                          |        |   |       |       |    |
|----------------------------------------------------------|--------|---|-------|-------|----|
| Species:Inoculation:HerbMix                              | 9.528  | 3 | 1.713 | 0.162 |    |
| InitDiameter:Inoculation:HerbMix                         | 0.147  | 1 | 0.079 | 0.778 |    |
| Biochar:Inoculation:HerbMix                              | 4.057  | 1 | 2.189 | 0.139 |    |
| Species:InitDiameter:Spacing                             | 8.470  | 6 | 0.762 | 0.600 |    |
| Species:Biochar:Spacing                                  | 4.014  | 6 | 0.361 | 0.904 |    |
| InitDiameter:Biochar:Spacing                             | 1.813  | 2 | 0.489 | 0.613 |    |
| Species:Inoculation:Spacing                              | 15.594 | 6 | 1.402 | 0.210 |    |
| InitDiameter:Inoculation:Spacing                         | 4.324  | 2 | 1.166 | 0.312 |    |
| Biochar:Inoculation:Spacing                              | 3.091  | 2 | 0.834 | 0.435 |    |
| Species:HerbMix:Spacing                                  | 13.021 | 6 | 1.171 | 0.319 |    |
| InitDiameter:HerbMix:Spacing                             | 17.884 | 2 | 4.824 | 0.008 | ** |
| Biochar:HerbMix:Spacing                                  | 0.323  | 2 | 0.087 | 0.917 |    |
| Inoculation:HerbMix:Spacing                              | 0.070  | 2 | 0.019 | 0.981 |    |
| Species:InitDiameter:Biochar:Inoculation                 | 1.829  | 3 | 0.329 | 0.805 |    |
| Species:InitDiameter:Biochar:HerbMix                     | 3.504  | 3 | 0.630 | 0.596 |    |
| Species:InitDiameter:Inoculation:HerbMix                 | 5.815  | 3 | 1.046 | 0.371 |    |
| Species:Biochar:Inoculation:HerbMix                      | 6.229  | 3 | 1.120 | 0.340 |    |
| InitDiameter:Biochar:Inoculation:HerbMix                 | 4.693  | 1 | 2.532 | 0.112 |    |
| Species:InitDiameter:Biochar:Spacing                     | 3.955  | 6 | 0.356 | 0.907 |    |
| Species:InitDiameter:Inoculation:Spacing                 | 12.619 | 6 | 1.135 | 0.340 |    |
| Species:Biochar:Inoculation:Spacing                      | 10.646 | 6 | 0.957 | 0.453 |    |
| InitDiameter:Biochar:Inoculation:Spacing                 | 1.588  | 2 | 0.428 | 0.652 |    |
| Species:InitDiameter:HerbMix:Spacing                     | 13.069 | 6 | 1.175 | 0.317 |    |
| Species:Biochar:HerbMix:Spacing                          | 3.440  | 6 | 0.309 | 0.932 |    |
| InitDiameter:Biochar:HerbMix:Spacing                     | 1.258  | 2 | 0.339 | 0.712 |    |
| Species:Inoculation:HerbMix:Spacing                      | 16.563 | 6 | 1.489 | 0.178 |    |
| InitDiameter:Inoculation:HerbMix:Spacing                 | 0.034  | 2 | 0.009 | 0.991 |    |
| Biochar:Inoculation:HerbMix:Spacing                      | 3.937  | 2 | 1.062 | 0.346 |    |
| Species:InitDiameter:Biochar:Inoculation:HerbMix         | 6.493  | 3 | 1.167 | 0.321 |    |
| Species:InitDiameter:Biochar:Inoculation:Spacing         | 9.475  | 6 | 0.852 | 0.530 |    |
| Species:InitDiameter:Biochar:HerbMix:Spacing             | 7.393  | 6 | 0.665 | 0.678 |    |
| Species:InitDiameter:Inoculation:HerbMix:Spacing         | 17.857 | 6 | 1.605 | 0.142 |    |
| Species:Biochar:Inoculation:HerbMix:Spacing              | 19.573 | 6 | 1.760 | 0.104 |    |
| InitDiameter:Biochar:Inoculation:HerbMix:Spacing         | 4.111  | 2 | 1.109 | 0.330 |    |
| Species:InitDiameter:Biochar:Inoculation:HerbMix:Spacing | 20.132 | 6 | 1.810 | 0.093 |    |

Significance codes:  $P < 0.001$  '\*\*\*',  $P < 0.01$  '\*\*',  $P < 0.05$  '\*'

**Table S6.** The standard deviation of random effect factors on split-split plot design for regression model on data group of fine tailing with spacing effect. The total observation data is 2132.

| Groups                                           | No. of Obs. | Variance | Std.Dev. |
|--------------------------------------------------|-------------|----------|----------|
| HerbMix:(Inoculation:(Biochar:(Block:Location))) | 64          | 0.044    | 0.211    |
| Inoculation:(Biochar:(Block:Location))           | 32          | 0.023    | 0.153    |
| Biochar:(Block:Location)                         | 16          | 0        | 0        |
| Block:Location                                   | 8           | 0        | 0        |
| Location                                         | 2           | 0.062    | 0.249    |
| Residual                                         |             | 1.854    | 1.362    |
